# Supplementary material for: Molecular Decision Tree Algorithms Predict Individual Recurrence Pattern for Locally Advanced Nasopharyngeal Carcinoma
Source: PubMed Central journal article supplement — J Cancer. 2019 Jun 2;10(15):3323–32. doi: 10.7150/jca.29693 (PMC6603411; doi:10.7150/jca.29693), 2019-06-02
Supplement: jcav10p3323s1.pdf [file jcav10p3323s1.pdf]

## Supplementary table

**Table S1.** The tumor biomarkers immunohistochemical staining information

| Pathological signaling | Tumor markers    | Antibody information   | Dilutions |
|------------------------|------------------|------------------------|-----------|
| Migration & Invasion   |                  |                        |           |
|                        | E-Cadherin       | Cell Signaling, # 4065 | 1:50      |
|                        | N-Cadherin       | Upstate, clone 13A9    | 1:200     |
|                        | $\beta$ -catenin | Millipore, MAB2081     | 1:100     |
|                        | Snail            | Abcam, ab70983         | 1:50      |
|                        | Twist            | Santa Cruz, SC-102032  | 1:50      |
|                        | C-Met            | Santa Cruz, SC-161     | 1:200     |
|                        | nm23-H1          | Santa Cruz, SC-56928   | 1:200     |
| Apoptosis & autophagy  |                  |                        |           |
|                        | Beclin 1         | Santa Cruz, SC-11427   | 1:200     |
|                        | AKT 1            | Cell Signaling, # 4685 | 1:100     |
|                        | Bax              | Santa Cruz, SC-7480    | 1:200     |
|                        | Survivin         | Santa Cruz, SC-47750   | 1:100     |
|                        | Bcl-2            | Santa Cruz, SC-7382    | 1:50      |
|                        | Pontin           | Cell Signaling, # 8959 | 1:100     |
| Cell cycle             |                  |                        |           |
|                        | 14-3-3 $\sigma$  | Santa Cruz, SC-100638  | 1:200     |
|                        | CENP-H           | Santa Cruz, SC-22792   | 1:200     |
|                        | Aurora-A         | Upstate, # 04-1037     | 1:200     |
|                        | Cyclin D1        | Cell Signaling, # 2978 | 1:200     |
|                        | CDC2             | Santa Cruz, SC-53      | 1:200     |
|                        | Ki-67            | Santa Cruz, SC-23900   | 1:50      |
|                        | ERK              | Santa Cruz, SC-94      | 1:200     |
|                        | P21WAF1          | Santa Cruz, SC-817     | 1:200     |
|                        | p-ERK            | Santa Cruz, SC-7383    | 1:100     |
|                        | P27              | Millipore, clone Y236  | 1:200     |
|                        | Stathmin         | Cell Signaling, # 3352 | 1:200     |
| Microvessel density    |                  |                        |           |
|                        | CD34             | MaiXin, MAB-0034-P     | 1:200     |
|                        | CD31             | MaiXin, MAB-0031       | 1:200     |
| Tumor microenvironment |                  |                        |           |
|                        | MMP-2            | Santa Cruz, SC-53630   | 1:200     |
|                        | MMP-9            | Santa Cruz, SC-6840    | 1:200     |
|                        | TIMP-2           | Santa Cruz, SC-21753   | 1:200     |
|                        | COX2             | Santa Cruz, SC-58344   | 1:200     |
|                        | HIF-1 $\alpha$   | Millipore, MAB5382     | 1:200     |
| Others                 |                  |                        |           |
|                        | EZH2             | Cell Signaling, # 4905 | 1:200     |
|                        | LMP 1            | Santa Cruz, SC-57721   | 1:200     |

**Table S2.** The predictive efficacy of decision tree algorithm in prediction of recurrence pattern for locally advanced NPC

| Dataset          | Test scheme      | PPV   | NPV  | Sensitivity | Specificity | AUC  | OA   |
|------------------|------------------|-------|------|-------------|-------------|------|------|
| Overall patients | Training subset  | 86.0  | 81.0 | 91.0        | 72.0        | 80.0 | 84.5 |
|                  | Overall patients | 87.6  | 85.4 | 92.4        | 77.4        | 92.2 | 86.9 |
| IC/CCRT subset   | Training subset  | 100.0 | 88.9 | 92.3        | 100.0       | 95.2 | 95.2 |
|                  | IC/CCRT patients | 85.7  | 88.9 | 93.3        | 77.4        | 91.3 | 86.8 |
| IC/RT subset     | Training subset  | 87.0  | 82.0 | 93.0        | 69.0        | 86.2 | 85.7 |
|                  | IC/RT patients   | 93.2  | 76.0 | 87.2        | 87.4        | 93.6 | 87.0 |

## **Supplementary methods**

### **Feature subset selection**

Feature subset selection algorithm usually falls into two categories, named as filter and wrapper methods [1]. Filter method select features subset at a pre-processing step, which is independent of the chosen predictor. Among the existing filter methods in feature weighting, the RELIEF algorithm is considered as one of the most powerful ones due to its simplicity and effectiveness [2]. Among of these RELIEF algorithms, the Local Linear RELIEF (LL-RELIEF) model is the pioneering technique in the RELIEF family [3]. LL-RELIEF weights the feature importance by iterative maximizing the margin between different sample subsets. The features weights are estimated under assumption of local linear, thus a given complex problem is analysed by parsing it into a set of locally linear problems. LL-RELIEF has been shown to be effective in removing redundant features and in handling many feature selection problems [4]. In comparison, wrapper method uses base classifier to score features subset according to their predictive power. Though there are many classifiers, such as Support Vector Machine (SVM), Naive Bayes, selecting of suitable classifier catering to the interested dataset is still an open problem [5,6]. [3, 4]Alternatively, one may increase the performance of weak binary classifiers, as the decision tree algorithm in our case, by reinforcing training on misclassified samples through voting to combine the output of multiple models [7]. This technique, which is called boosting, can achieve comparable performance to classical classifier and is less sensitive to data characteristics [8,9]. The Adaptive boosting (AdaBoost) is a widely used boosting algorithm due to its high efficiency and implementation simplicity [10,11]. The wrapper method has the advantage of favourable performance; however, its usage in biomedical area is limited because of its high computational cost.

## **AdaBoost model**

AdaBoost is a boosting algorithm, which runs a given weak learner several times on slightly altered training data, and combines the derived hypotheses to one final hypothesis in order to achieve greater accuracy than the weak learner's hypothesis would have [12]. The AdaBoost assumes that each training example of the set act in different discrimination roles at different training stages. The features that can be easily recognized are supposed to have less power in classification, while the features that are misclassified should be penalized to have good discrimination power. Therefore, the weak learner focuses on the 'difficult' features, which are believed to be rich of information. The richness of each feature is represented by a weight. The purpose of the classification is to pursue accurate weights for all the participants by adaptively adjusting, which is based on the classification results in every round. The final classification result is a combination of the results obtained from all rounds.

## **Measurements after receiving operating characteristics analysis**

The following terms were calculated for evaluating algorithm performance. True positive (TP) and true negative (TN) means the total number of correctly predicted patients, and false negative (FN) and false positive (FP) indicates total number of misclassified patients. The overall accuracy is defined as  $OA = (TP+TN)/(TP+TN+FP+FN)$ , which may also be reported as a percentage. We defines the sensitivity =  $TP/(TP+FN)$  and specificity =  $TN/(TN+FP)$ . AUC refers to area under the receiver operating characteristic (ROC) curve, which is a plot of true positive rate (i.e. sensitivity) versus false positive rate (i.e. 1-specificity) for predicted patients.

## **References**

1. Sun Y. Iterative RELIEF for feature weighting: algorithms, theories, and applications. IEEE Trans Pattern Anal Mach Intell. 2007;29:1035-1051.

2. Sun Y, Todorovic S, Goodison S. Local-learning-based feature selection for high-dimensional data analysis. *IEEE Trans Pattern Anal Mach Intell.* 2010;32:1610-1626.
3. Sun Y, Goodison S, Li J, et al. Improved breast cancer prognosis through the combination of clinical and genetic markers. *Bioinformatics.* 2007;23:30-37.
4. Chen HL, Yang B, Liu J, et al. A support vector machine classifier with rough set-based feature selection for breast cancer diagnosis. *Expert Systems with Applications.* 2011;38:9014–9022.
5. Aruna S, Rajagopalan SP, Nandakishore LV. Knowledge based analysis of various statistical tools in detecting breast cancer. *Computer Science & Information Technology (CS&IT).* 2011;2:37-45.
6. Quinlan JR. *C4. 5: Programs for Machine Learning (Morgan Kaufmann Series in Machine Learning)*. 1st ed. Morgan Kaufmann Publishers. 1993.
7. Lee JW, Lee JB, Park M, et al. An extensive comparison of recent classification tools applied to microarray data. *Computational Statistics & Data Analysis.* 2005;48:869–885.
8. Sun YJ, Todorovic S, Goodison S. Local-learning-based feature selection for high-dimensional data analysis. *IEEE Trans Pattern Anal Mach Intell.* 2010;32:1610-1620.
9. Takahashi H, Aoyagi K, Nakanishi Y, et al. Classification of intramural metastases and lymph node metastases of esophageal cancer from gene expression based on boosting and projective adaptive resonance theory. *J Biosci Bioeng.* 2006;102:46-52.
10. Moon H, Ahn H, Kodell RL, et al. Ensemble methods for classification of patients for personalized medicine with high-dimensional data. *Artif Intell Med.* 2007;41:197-207.
11. Takahashi H, Aoyagi K, Nakanishi Y, et al. Classification of intramural metastases and lymph node metastases of esophageal cancer from gene expression based on boosting and

projective adaptive resonance theory. *Journal of Bioscience and Bioengineering*. 2006;102:46-52.

12. Yetton BD, Niknazar M, Duggan KA, et al. Automatic detection of rapid eye movements (REMs): A machine learning approach. *J Neurosci Methods*. 2015;259:72-82.
